# Supplementary material for: Disrupted resolution mechanisms favour altered phagocyte responses in COVID-19
Source: PubMed Central journal article supplement (PMC8336787; doi:10.1161/circresaha.121.319142), 2021-07-09
Supplement: res-129-e54-s003.pdf [file res-129-e54-s003.pdf]

## MAJOR RESOURCES TABLE

| Antibodies                                                         |                   |                         |
|--------------------------------------------------------------------|-------------------|-------------------------|
| DESCRIPTION                                                        | SOURCE            | IDENTIFIER              |
| PE-Cy7 anti-human CD32                                             | eBiosciences      | Cat # 25-0329-41        |
| PE-Cy5 anti-CD64                                                   | Abcam             | Cat # ab192338          |
| Alexa Fluor anti-human 488 CD68                                    | Biolegend         | Cat # 333811            |
| Brilliant Violet anti-human 650 CD80                               | Biolegend         | Cat # 305227            |
| PerCP-Cy5.5 anti-human CD206                                       | Biolegend         | Cat # 321121            |
| PE-CF594 mouse anti-human CD163                                    | BD Biosciences    | Cat # 562670            |
| APC anti-human CD142 Antibody                                      | Biolegend         | Cat # 365205            |
| Human/Mouse Arginase 1/ARG1 PE-conjugated Antibody                 | Bio-Techne        | Cat # IC5868P           |
| Brilliant Violet 421™ anti-human MERTK Antibody                    | Biolegend         | Cat # 367603            |
| Alexa Fluor® 488 anti-human CD54 (ICAM1) Antibody                  | Biolegend         | Cat # 322713            |
| APC/Cy7 anti-human CD14 antibody                                   | Biolegend         | Cat # 367107            |
| PE/Cy7 anti-human CD14 Antibody                                    | Biolegend         | Cat # 325618            |
| Alexa Fluor® 647 anti-human CD14 Antibody                          | Biolegend         | Cat # 325612            |
| APC/Cyanine7 anti-human CD16 Antibody                              | Biolegend         | Cat # 302018            |
| Brilliant Violet 711™ anti-human CD11b Antibody                    | Biolegend         | Cat # 301344            |
| PE anti-human CD62P (P-Selectin) Antibody                          | Biolegend         | Cat # 304906            |
| Pacific Blue™ anti-human/mouse CD162 (CLA) Antibody                | Biolegend         | Cat # 321308            |
| PerCP/Cyanine5.5 anti-human CD63 Antibody                          | Biolegend         | Cat # 353020            |
| PE/Dazzle™ 594 anti-human CD49d Antibody                           | Biolegend         | Cat # 304326            |
| PE/Cy7 anti-human CD41 Antibody                                    | Biolegend         | Cat # 303718            |
| Cox2 (D5H5) XP® Rabbit mAb (Alexa Fluor® 488 Conjugate)            | Cell Signaling    | Cat # 13596S            |
| 5-Lipoxygenase Antibody [DyLight 405]                              | Bio-Techne        | Cat # NB110-58748V      |
| ALOX12 Rabbit polyclonal Antibody (C-term)                         | Abgent            | Cat # AP8877B           |
| 15-Lipoxygenase-1 Polyclonal Antibody, ALEXA FLUOR® 647 Conjugated | Bioss Antibodies  | Cat # BS-6505R-A647-BSS |
| Monoclonal Mouse IgG2a Anti-ALOX15B antibody                       | Sigma             | Cat # SAB1402114        |
| FPRL1/FPR2 Antibody                                                | Novus Biologicals | Cat # NLS1878           |
| GPR18 antibody                                                     | Biobyrt           | Cat # orb157333         |
| GPR32 antibody [N1], N-term                                        | Genetex           | Cat # GTX108119         |
| GPR37 Polyclonal Antibody                                          | Invitrogen        | Cat # PA5-65344         |
| GPR101 antibody (G Protein-Coupled Receptor 101)                   | antibodies-online | Cat # AA 451-500        |
| PathPlus™ LGR6 Antibody (N-Terminus)                               | Strattech         | Cat # LS-A442-LSP       |
| Human ChemR23 PE-conjugated Antibody                               | R&D systems       | Cat # FAB362P           |
| anti-human IFN-α mAb MT1/3/5, purified mouse IgG1                  | 2BScientific      | Cat # 3425-3-250        |
| Alexa Fluor® 647 anti-human IL-1β Antibody                         | Biolegend         | Cat # 508207            |

|                                           |                |              |
|-------------------------------------------|----------------|--------------|
| PerCP/Cyanine5.5 anti-human IL-6 Antibody | Biolegend      | Cat # 501117 |
| BV650 Mouse Anti-Human TNF                | BD Biosciences | Cat # 563418 |
| BV786 Rat Anti-Human and Viral IL-10      | BD Biosciences | Cat # 564049 |

#### Bacterial Strains

| DESCRIPTION              | SOURCE                   | IDENTIFIER                       |
|--------------------------|--------------------------|----------------------------------|
| Streptococcus pneumoniae | Public Health<br>England | NCTC 7465, serovar<br>serotype 1 |

#### Chemicals and reagents

| DESCRIPTION                                                                   | SOURCE                                                       | IDENTIFIER                             |
|-------------------------------------------------------------------------------|--------------------------------------------------------------|----------------------------------------|
| Ethanol, Absolute (200 proof), Mol Biology grade, Dnase, Rnase, Protease-free | Fisher Scientific Uk Ltd                                     | Cat # 10644795                         |
| Methanol, Optima(TM) LC/MS grade                                              | Fisher Scientific Uk Ltd                                     | Cat # 10767665                         |
| Acetic acid                                                                   | Fluka                                                        | Cat # 07692-1L-F                       |
| Methyl formate, 98% for spectroscopy                                          | Fisher Scientific Uk Ltd                                     | Cat # 10414315                         |
| n-Hexane; For HPLC; 97+%; Acros Organics                                      | Fisher Scientific Uk Ltd                                     | Cat # 11934421                         |
| Deuterium-labelled 5S-HETE                                                    | Cayman Chemicals                                             | Cat # 10007276                         |
| Deuterium-labelled Leukotriene (LT) B4                                        | Cayman Chemicals                                             | Cat #: 320110                          |
| Deuterium-labelled Lipoxin (LX) A4                                            | Cayman Chemicals                                             | Cat #: 10007737                        |
| Deuterium-labelled Resolvin (Rv) D2                                           | Cayman Chemicals                                             | Cat #: 11184                           |
| Deuterium-labelled prostaglandin (PG) E2                                      | Cayman Chemicals                                             | Cat #: 314010                          |
| PGD2                                                                          | Cayman Chemicals                                             | Cat #: 10007202                        |
| PGE2                                                                          | Cayman Chemicals                                             | Cat #: 10007211                        |
| PGF2a                                                                         | Cayman Chemicals                                             | Cat # 16010                            |
| Thromboxane B2                                                                | Cayman Chemicals                                             | Cat #: 10007237                        |
| LTB4                                                                          | Cayman Chemicals                                             | Cat #: 10007240                        |
| 20-OH-LTB4                                                                    | Cayman Chemicals                                             | Cat # 20190                            |
| LXA4                                                                          | Cayman Chemicals                                             | Cat #: 10007271                        |
| LXB4                                                                          | Cayman Chemicals                                             | Cat #: 90420                           |
| 5S,12S-diHETE                                                                 | In-house biogenic synthesis (J Dalli)                        | <a href="#">Borgeat et al., (1982)</a> |
| 5S,15S-diHETE                                                                 | Cayman Chemicals                                             | Cat #: 35280                           |
| 15-epi-LXA4                                                                   | Cayman Chemicals                                             | Cat #: 90415                           |
| 15-epi-LXB4                                                                   | Custom Synthesis (Dr Charles Serhan, Harvard Medical School) | <a href="#">Claria et al., (1996)</a>  |
| RvE1                                                                          | Cayman Chemicals                                             | Cat #: 10007848                        |

|                 |                                                                       |                                        |
|-----------------|-----------------------------------------------------------------------|----------------------------------------|
| RvE2            | Custom synthesis                                                      | <a href="#">Serhan et al., (2000)</a>  |
| RvE3            | Custom synthesis                                                      | <a href="#">Isobe et al., (2012)</a>   |
| RvD1            | Cayman Chemicals                                                      | Cat #: 10012554                        |
| RvD2            | Cayman Chemicals                                                      | Cat #: 10007279                        |
| RvD3            | Cayman Chemicals                                                      | Cat #: 13834                           |
| RvD4            | Custom Synthesis<br>(Dr Charles Serhan,<br>Harvard Medical<br>School) | <a href="#">Winkler et al., (2016)</a> |
| RvD5            | Cayman Chemicals                                                      | Cat #: 10007280                        |
| RvD6            | In-house biogenic<br>synthesis (J Dalli)                              | N/A                                    |
| 17R-RvD1        | Cayman Chemicals                                                      | Cat #: 13060                           |
| 17R-RvD3        | Custom Synthesis<br>(Dr Charles Serhan,<br>Harvard Medical<br>School) | <a href="#">Dalli et al., (2013b)</a>  |
| Maresin (MaR) 1 | Cayman Chemicals                                                      | Cat #: 10878                           |
| MaR2            | Cayman Chemicals                                                      | Cat #: 16369                           |
| 4S,14S-diHDHA   | In-house biogenic<br>synthesis (J Dalli)                              | <a href="#">Serhan et al., (2009)</a>  |
| 7S,14S-diHDHA   | In-house biogenic<br>synthesis (J Dalli)                              | <a href="#">Serhan et al., (2009)</a>  |
| 22-OH-MaR1      | In-house biogenic<br>synthesis (J Dalli)                              | <a href="#">Colas et al., (2016)</a>   |
| 14-oxo-MaR1     | In-house biogenic<br>synthesis (J Dalli)                              | <a href="#">Colas et al., (2016)</a>   |
| Protectin (PD)1 | Custom Synthesis<br>(Dr Charles Serhan,<br>Harvard Medical<br>School) | <a href="#">Petasis et al., (2012)</a> |
| 10S,17S-diHDHA  | Custom Synthesis<br>(Dr Charles Serhan,<br>Harvard Medical<br>School) | <a href="#">Petasis et al., (2012)</a> |
| 22-OH-PD1       | Custom Synthesis<br>(Dr Trond V.<br>Hansen, University<br>of Oslo)    | <a href="#">Tungen et al., (2014b)</a> |
| n-3 DPA         | Cayman Chemicals                                                      | Item № 21907                           |
| RvD1n-3 DPA     | In-house biogenic<br>synthesis (J Dalli)                              | <a href="#">Dalli et al., (2013a)</a>  |
| RvD2n-3 DPA     | In-house biogenic<br>synthesis (J Dalli)                              | <a href="#">Dalli et al., (2013a)</a>  |
| RvD5n-3 DPA     | In-house biogenic<br>synthesis (J Dalli)                              | <a href="#">Dalli et al., (2013a)</a>  |
| MaR1n-3 DPA     | Custom Synthesis<br>(Dr Trond V.<br>Hansen, University                | <a href="#">Tungen et al., (2014a)</a> |

|                                                                                             |                                                              |                                       |
|---------------------------------------------------------------------------------------------|--------------------------------------------------------------|---------------------------------------|
|                                                                                             | of Oslo)                                                     |                                       |
| 7S, 14S-diHDPA                                                                              | In-house biogenic synthesis (J Dalli)                        | <a href="#">Dalli et al. (2013a)</a>  |
| PD1n-3 DPA                                                                                  | Custom Synthesis (Dr Trond V. Hansen, University of Oslo)    | <a href="#">Aursnes et al. (2014)</a> |
| PD2n-3 DPA                                                                                  | In-house biogenic synthesis (J Dalli)                        | <a href="#">Dalli et al. (2013a)</a>  |
| 16S, 17S-ePDn-3 DPA                                                                         | Custom Synthesis (Dr Trond V. Hansen, University of Oslo)    | This paper                            |
| 10S,17S-diHDPA                                                                              | In-house biogenic synthesis (J Dalli)                        | <a href="#">Dalli et al. (2013a)</a>  |
| $\Delta$ 15trans-PD1n-3 DPA                                                                 | In-house biogenic synthesis (J Dalli)                        | This paper                            |
| 10epi- $\Delta$ 15trans-PD1n-3 DPA                                                          | In-house biogenic synthesis (J Dalli)                        | This paper                            |
| 17R-PD1                                                                                     | Custom Synthesis (Dr Charles Serhan, Harvard Medical School) | <a href="#">Petasis et al. (2012)</a> |
| Brain Heart Infusion Broth (Dehydrated)                                                     | ThermoFisher                                                 | Cat # 11469668                        |
| Histopaque – 1077                                                                           | Sigma                                                        | Cat # 10771-100ML                     |
| Dulbecco's phosphate buffer saline with MgCl <sub>2</sub> and CaCl <sub>2</sub> (PBS+/+)    | Sigma                                                        | Cat # D8662                           |
| Dulbecco's phosphate buffer saline without MgCl <sub>2</sub> and CaCl <sub>2</sub> (PBS-/-) | Sigma                                                        | Cat # D8537                           |
| RPMI-1640 Medium                                                                            | Sigma                                                        | Cat # R8758                           |
| Recombinant Human GM-CSF                                                                    | Biolegend                                                    | Cat # 572902                          |
| Human serum (type AB; male)                                                                 | Sigma                                                        | Cat # H4522-100ML                     |
| Penicillin-Streptomycin                                                                     | Sigma                                                        | Cat # P4333                           |
| Fetal bovine serum (FBS)                                                                    | Gibco                                                        | Cat # 10500064                        |
| DMSO, cell culture reagent                                                                  | ChemCruz                                                     | Cat # sc-358801                       |
| Bovine serum albumin (BSA)                                                                  | Sigma                                                        | Cat # A9418                           |
| EDTA                                                                                        | Invitrogen                                                   | Cat # 15575-038                       |
| pHrodo Red Succinimidyl Ester                                                               | Invitrogen                                                   | Cat # P36600                          |
| pHrodo Green S. aureus Bioparticles Conjugate for Phagocytosis                              | Invitrogen                                                   | Cat # P35367                          |
| pHrodo Red Zymosan Bioparticles Conjugate for Phagocytosis                                  | Invitrogen                                                   | Cat # P35364                          |
| Hoechst 33342 Ready Flow Reagent                                                            | Invitrogen                                                   | Cat # R37165                          |
| UltraComp eBeads™ Compensation Beads                                                        | Invitrogen                                                   | Cat # 01-2222-42                      |
| Rainbow Calibration Particles (8 peaks), 3.0 - 3.4 $\mu$ m                                  | BD bioscience                                                | Cat # 559123                          |
| Trypan Blue                                                                                 | Sigma                                                        | Cat # T8154                           |
| Recombinant Human S100A8/A9 Heterodimer (carrier-free)                                      | Biolegend                                                    | Cat # 753404                          |

|                                                    |                 |                  |
|----------------------------------------------------|-----------------|------------------|
| Brefeldin A Solution (1,000X)                      | Biolegend       | Cat # 420601     |
| Whole Blood Lysing Reagent                         | Beckman Coulter | Cat # 6603152    |
| Permeabilization buffer (10X)                      | eBiosciences    | Cat # 00-8333-56 |
| Fixation/Permeabilization Concentrate              | eBiosciences    | Cat # 00-5123-43 |
| Fixation/Permeabilization Diluent                  | eBiosciences    | Cat # 00-5223-56 |
| Hanks Balanced Salt solution                       | Sigma           | Cat # H6648      |
| γ-Globulins from human blood (FC block)            | Sigma           | Cat # G4386-5G   |
| PerCP/Cy5.5® Conjugation Kit - Lightning-Link®     | Abcam           | Cat # ab102911   |
| Alexa Fluor® 488 Conjugation Kit - Lightning-Link  | Abcam           | Cat # ab236553   |
| Alexa Fluor® 700 Conjugation Kit - Lightning-Link® | Abcam           | Cat # ab269824   |
| Alexa Fluor® 594 Antibody Labeling Kit             | Invitrogen      | Cat # A20185     |
| APEX™ Pacific Blue™ Antibody Labeling Kit          | Invitrogen      | Cat # A10478     |
| APEX™ Alexa Fluor™ 647 Antibody Labeling Kit       | Invitrogen      | Cat # A10475     |

#### Cultured cells

| DESCRIPTION | SOURCE | IDENTIFIER    |
|-------------|--------|---------------|
| HL-60       | ATCC   | Cat # CCL-240 |

#### Software

| DESCRIPTION         | SOURCE            | IDENTIFIER                                                        |
|---------------------|-------------------|-------------------------------------------------------------------|
| FlowJo software v10 | Tree Star         | <a href="https://www.flowjo.com/">https://www.flowjo.com/</a>     |
| GraphPad Prism 9.0  | GraphPad Software | <a href="https://www.graphpad.com/">https://www.graphpad.com/</a> |

#### Other

| DESCRIPTION                                                       | SOURCE             | IDENTIFIER       |
|-------------------------------------------------------------------|--------------------|------------------|
| Isolute 500 mg / 3ml C18 SPE column                               | Biotage, Sweden    | Cat # 220-0050-B |
| Poroshell 120 EC-18 4.6 mm x100 mm x 2.7 μm reversed phase column | Agilent, USA       | N/A              |
| LSR Fortessa cell analyser                                        | BD Biosciences, UK | N/A              |
| Extra-Hera                                                        | Biotage, Sweden    | N/A              |
| TurboVap LV                                                       | Biotage, Sweden    | N/A              |
| Qtrap 5500/6500                                                   | AB Sciex           | N/A              |
| Shimadzu SIL-20AC auto-injector                                   | Shimadzu Corp.     | N/A              |
| LC-20AD Binary pump                                               | Shimadzu Corp.     | N/A              |
| Celldiscoverer 7 high-content imager                              | Carl Zeiss Ltd     | N/A              |
